# Supplementary material for: Travel Time and Distance and Participation in Precision Oncology Trials at the National Cancer Center Hospital
Source: PubMed Central journal article supplement (PMC10504617; doi:10.1001/jamanetworkopen.2023.33188), 2023-09-15

## Supplemental Online Content

Uehara Y, Koyama T, Katsuya Y, et al. Travel Time and Distance and Participation in Oncology Trials at a National Cancer Center. *JAMA Netw Open*. 2023;6(9):e2333188. doi:10.1001/jamanetworkopen.2023.33188

**eTable 1.** Genomic Alterations and Corresponding Therapies in Genotype-Matched Trials

**eTable 2.** Characteristics of Patients Stratified by Enrollment in Genotype-Matched Trials or All-Cancer Clinical Trials

**eTable 3.** Characteristics of Patients Participating in Genotype-Matched and Genotype-Nonmatched Trials

**eTable 4.** Univariable and Multivariable Analyses of Factors Associated With All-Cancer Clinical Trial Participation by Travel Time to the Hospital

**eTable 5.** Univariable and Multivariable Analyses of Factors Associated With All-Cancer Clinical Trial Participation by Travel Distance to the Hospital

**eFigure 1.** Travel Time and Distance Map Centered on the National Cancer Center Hospital

**eFigure 2.** Correlation Between Travel Time and Distance

**eFigure 3.** Scatter Plot of Patients With a Travel Time Less Than 120 Minutes and Travel Distance 100 or More km

This supplemental material has been provided by the authors to give readers additional information about their work.

**eTable 1. Genomic Alterations and Corresponding Therapies in Genotype-Matched Trials**

| <b>Genomic alterations</b>         | <b>Corresponding therapy</b>                  |
|------------------------------------|-----------------------------------------------|
| <i>KRAS</i> G12C                   | KRAS-G12C inhibitor                           |
| <i>KRAS</i> G12S                   | SHP2 inhibitor                                |
| <i>KRAS</i> G12D                   | KRAS inhibitor                                |
| <i>KRAS</i> G12D                   | MEK inhibitor                                 |
| <i>KRAS</i> G12D                   | SHP2 inhibitor                                |
| <i>KRAS</i> G12D                   | MAPK pathway inhibitor                        |
| <i>KRAS</i> G12R                   | KRAS inhibitor                                |
| <i>KRAS</i> G12V                   | MEK inhibitor                                 |
| <i>KRAS</i> A146T                  | MAPK pathway inhibitor                        |
| <i>EGFR</i> exon 19del             | ERBB inhibitor                                |
| <i>BRCA1</i> splice site 5277+1G>C | PARP inhibitor                                |
| <i>BRCA2</i> R18fs*12              | PARP inhibitor                                |
| <i>BRCA2</i> E826                  | PARP inhibitor                                |
| <i>BRCA2</i> K1440fs*4             | PARP inhibitor                                |
| <i>BRCA2</i> I1859fs*3             | PARP inhibitor                                |
| <i>BRCA2</i> R2318*                | PARP inhibitor                                |
| <i>BRCA2</i> splice site 9117G>A   | PARP inhibitor                                |
| <i>BRAF</i> V600E                  | MEK inhibitor, BRAF inhibitor                 |
| <i>BRAF</i> V600E                  | MEK inhibitor, BRAF inhibitor, EGFR inhibitor |
| <i>BRAF</i> N486 P490del           | MEK inhibitor, BRAF inhibitor                 |
| <i>BRAF</i> N486 P490 del          | ERK1/2 inhibitor                              |
| <i>HER2</i> amplification          | HER2 inhibitor                                |
| <i>HER2</i> S310F                  | HER2 inhibitor                                |
| <i>HER2</i> S310Y                  | HER2 inhibitor                                |
| <i>HER2</i> R678Q                  | HER2 inhibitor                                |
| <i>HER2</i> T733I                  | HER2 inhibitor                                |
| <i>HER2</i> A775 G776insYVMA       | HER2 inhibitor                                |
| <i>MDM2</i> amplification          | MDM2 inhibitor                                |
| <i>TP53</i> C238G                  | WEE1 inhibitor                                |
| <i>KIF5B-RET</i> fusion            | RET inhibitor                                 |
| <i>APC</i> Q236*                   | Wnt/ $\beta$ -catenin signaling inhibitor     |
| <i>APC</i> K516N                   | Wnt/ $\beta$ -catenin signaling inhibitor     |
| <i>APC</i> splice site 835-8A>G    | Wnt/ $\beta$ -catenin signaling inhibitor     |
| <i>APC</i> R876*                   | Wnt/ $\beta$ -catenin signaling inhibitor     |
| <i>APC</i> R1051*                  | Wnt/ $\beta$ -catenin signaling inhibitor     |
| <i>APC</i> E1168*                  | Wnt/ $\beta$ -catenin signaling inhibitor     |
| <i>APC</i> S1327*                  | Wnt/ $\beta$ -catenin signaling inhibitor     |
| <i>APC</i> R1450*                  | Wnt/ $\beta$ -catenin signaling inhibitor     |
| <i>APC</i> Q1367*                  | Wnt/ $\beta$ -catenin signaling inhibitor     |
| <i>APC</i> F1396fs*20              | Wnt/ $\beta$ -catenin signaling inhibitor     |
| <i>APC</i> S1465fs*3               | Wnt/ $\beta$ -catenin signaling inhibitor     |
| <i>APC</i> T1556fs*3               | Wnt/ $\beta$ -catenin signaling inhibitor     |
| <i>IDH1</i> R132C                  | IDH1 inhibitor                                |
| <i>ROS1-GOPC</i> fusion            | ROS1 inhibitor                                |
| <i>ATM</i> R1898Q                  | ATR inhibitor                                 |
| <i>ATM</i> W2769*                  | ATR inhibitor                                 |
| <i>FGFR1</i> amplification         | FGFR inhibitor                                |
| <i>FGFR2-CIT</i> fusion            | FGFR inhibitor                                |
| <i>FGFR2-YPEL5</i> fusion          | FGFR inhibitor                                |
| <i>FGFR2-FOXP1</i> fusion          | FGFR inhibitor                                |
| <i>FGFR2</i> amplification         | FGFR inhibitor                                |
| <i>FGFR2</i> H167 N173del          | FGFR inhibitor                                |
| <i>FGFR2</i> F276C                 | FGFR inhibitor                                |

| <b>Genomic alterations</b>                   | <b>Corresponding therapy</b> |
|----------------------------------------------|------------------------------|
| <i>FGFR3</i> S249C                           | FGFR inhibitor               |
| <i>FGFR3</i> fusion (unknown fusion partner) | FGFR inhibitor               |
| <i>ALK</i> amplification                     | ALK inhibitor                |
| <i>RET</i> V804M                             | RET inhibitor                |
| <i>PIK3CA</i> N345T                          | PI3K inhibitor               |
| <i>MTAP</i> loss                             | PRMT5 inhibitor              |
| High TMB <sup>a</sup>                        | Anti-PD-1/PD-L1 antibody     |

Abbreviation: TMB, tumor mutational burden.

<sup>a</sup>High TMB was defined as  $\geq 10$  mutations per megabase.

**eTable 2. Characteristics of Patients Stratified by Enrollment in Genotype-Matched Trials or All-Cancer Clinical Trials (tumor Type and Laboratory Values, n = 1,127)**

| Demographics                 | All patients<br>(N = 1127) | Enrolled in<br>genotype-matched<br>trials<br>(n = 127) | Not enrolled in<br>genotype-matched<br>trials<br>(n = 1000) | <i>P</i> | Enrolled in all-<br>cancer clinical<br>trials<br>(n = 241) | Not enrolled in<br>all-cancer<br>clinical trials<br>(n = 886) | <i>P</i> |
|------------------------------|----------------------------|--------------------------------------------------------|-------------------------------------------------------------|----------|------------------------------------------------------------|---------------------------------------------------------------|----------|
| Tumor type, n (%)            |                            |                                                        |                                                             |          |                                                            |                                                               |          |
| Gastrointestinal             | 335 (30)                   | 44 (35)                                                | 291 (29)                                                    | .36      | 86 (36)                                                    | 249 (28)                                                      | .07      |
| Hepatobiliary                | 314 (28)                   | 30 (24)                                                | 284 (28)                                                    |          | 56 (23)                                                    | 258 (29)                                                      |          |
| Gynecologic                  | 179 (16)                   | 22 (17)                                                | 157 (16)                                                    |          | 40 (17)                                                    | 139 (16)                                                      |          |
| Breast                       | 61 (5)                     | 4 (3)                                                  | 57 (6)                                                      |          | 9 (4)                                                      | 52 (6)                                                        |          |
| Lung                         | 56 (5)                     | 9 (7)                                                  | 47 (5)                                                      |          | 18 (8)                                                     | 38 (4)                                                        |          |
| Sarcoma                      | 43 (4)                     | 8 (6)                                                  | 35 (4)                                                      |          | 11 (5)                                                     | 32 (4)                                                        |          |
| Genitourinary                | 42 (4)                     | 4 (3)                                                  | 38 (4)                                                      |          | 10 (4)                                                     | 32 (4)                                                        |          |
| Head and neck                | 23 (2)                     | 3 (2)                                                  | 20 (2)                                                      |          | 4 (2)                                                      | 19 (2)                                                        |          |
| Skin, melanoma               | 14 (1)                     | 0 (0)                                                  | 14 (1)                                                      |          | 1 (0.4)                                                    | 13 (2)                                                        |          |
| Central nervous system       | 14 (1)                     | 1 (1)                                                  | 13 (1)                                                      |          | 1 (0.4)                                                    | 13 (2)                                                        |          |
| Carcinoma of unknown primary | 10 (1)                     | 1 (1)                                                  | 9 (1)                                                       |          | 1 (0.4)                                                    | 9 (1)                                                         |          |
| Other <sup>a</sup>           | 36 (3)                     | 1 (1)                                                  | 35 (4)                                                      |          | 4 (2)                                                      | 32 (4)                                                        |          |

| Demographics                                          | All patients<br>(N = 1127) | Enrolled in<br>genotype-matched<br>trials<br>(n = 127) | Not enrolled in<br>genotype-matched<br>trials<br>(n = 1000) | P     | Enrolled in all-<br>cancer clinical<br>trials<br>(n = 241) | Not enrolled in<br>all-cancer<br>clinical trials<br>(n = 886) | P     |
|-------------------------------------------------------|----------------------------|--------------------------------------------------------|-------------------------------------------------------------|-------|------------------------------------------------------------|---------------------------------------------------------------|-------|
| Neutrophils (/μL) <sup>b</sup> , n (%)                |                            |                                                        |                                                             |       |                                                            |                                                               |       |
| <1,500                                                | 59 (5)                     | 3 (2)                                                  | 56 (6)                                                      | .15   | 4 (2)                                                      | 55 (6)                                                        | .005  |
| ≥1,500                                                | 1021 (91)                  | 124 (98)                                               | 897 (90)                                                    |       | 237 (98)                                                   | 784 (89)                                                      |       |
| Hemoglobin (g/dL) <sup>c</sup> , n (%)                |                            |                                                        |                                                             |       |                                                            |                                                               |       |
| <9                                                    | 92 (8)                     | 3 (2)                                                  | 89 (9)                                                      | .01   | 4 (2)                                                      | 88 (10)                                                       | <.001 |
| ≥9                                                    | 988 (88)                   | 124 (98)                                               | 864 (86)                                                    |       | 237 (98)                                                   | 751 (85)                                                      |       |
| Platelets (×10 <sup>3</sup> /μL) <sup>d</sup> , n (%) |                            |                                                        |                                                             |       |                                                            |                                                               |       |
| <100                                                  | 55 (5)                     | 3 (2)                                                  | 52 (5)                                                      | .20   | 4 (2)                                                      | 51 (6)                                                        | .01   |
| ≥100                                                  | 1025 (91)                  | 124 (98)                                               | 901 (90)                                                    |       | 237 (98)                                                   | 788 (90)                                                      |       |
| Albumin (g/dL) <sup>e</sup> , n (%)                   |                            |                                                        |                                                             |       |                                                            |                                                               |       |
| <3.5                                                  | 257 (23)                   | 11 (9)                                                 | 246 (25)                                                    | <.001 | 19 (8)                                                     | 238 (27)                                                      | <.001 |
| ≥3.5                                                  | 818 (73)                   | 116 (91)                                               | 702 (70)                                                    |       | 222 (92)                                                   | 596 (67)                                                      |       |
| LDH (U/dL) <sup>f</sup> , n (%)                       |                            |                                                        |                                                             |       |                                                            |                                                               |       |
| <2.5 × ULN                                            | 1000 (89)                  | 125 (98)                                               | 875 (88)                                                    | .02   | 236 (98)                                                   | 764 (87)                                                      | .01   |
| ≥2.5 × ULN                                            | 74 (7)                     | 2 (2)                                                  | 72 (7)                                                      |       | 5 (2)                                                      | 69 (8)                                                        |       |
| Creatinine (mg/dL) <sup>g</sup> , n (%)               |                            |                                                        |                                                             |       |                                                            |                                                               |       |
| <1.5                                                  | 1063 (94)                  | 126 (99)                                               | 937 (94)                                                    | .76   | 240 (99)                                                   | 823 (93)                                                      | .21   |
| ≥1.5                                                  | 16 (1)                     | 1 (1)                                                  | 15 (2)                                                      |       | 1 (1)                                                      | 15 (2)                                                        |       |

| Demographics                                 | All patients<br>(N = 1127) | Enrolled in<br>genotype-matched<br>trials<br>(n = 127) | Not enrolled in<br>genotype-matched<br>trials<br>(n = 1000) | P    | Enrolled in all-<br>cancer clinical<br>trials<br>(n = 241) | Not enrolled in<br>all-cancer<br>clinical trials<br>(n = 886) | P     |
|----------------------------------------------|----------------------------|--------------------------------------------------------|-------------------------------------------------------------|------|------------------------------------------------------------|---------------------------------------------------------------|-------|
| Total bilirubin (mg/dL) <sup>h</sup> , n (%) |                            |                                                        |                                                             |      |                                                            |                                                               |       |
| <1.5 × ULN                                   | 1059 (94)                  | 126 (99)                                               | 933 (93)                                                    | >.99 | 240 (99)                                                   | 819 (92)                                                      | .67   |
| ≥1.5 × ULN                                   | 9 (1)                      | 1 (1)                                                  | 8 (1)                                                       |      | 1 (1)                                                      | 8 (1)                                                         |       |
| AST (U/L) <sup>i</sup> , n (%)               |                            |                                                        |                                                             |      |                                                            |                                                               |       |
| <3.0 × ULN                                   | 1047 (93)                  | 126 (99)                                               | 921 (92)                                                    | .21  | 240 (99)                                                   | 807 (91)                                                      | .02   |
| ≥3.0 × ULN                                   | 32 (3)                     | 1 (1)                                                  | 31 (3)                                                      |      | 1 (1)                                                      | 31 (4)                                                        |       |
| CRP (mg/dL) <sup>j</sup> , n (%)             |                            |                                                        |                                                             |      |                                                            |                                                               |       |
| <5                                           | 931 (83)                   | 123 (97)                                               | 808 (81)                                                    | .002 | 235 (98)                                                   | 696 (79)                                                      | <.001 |
| ≥5                                           | 111 (10)                   | 3 (2)                                                  | 108 (11)                                                    |      | 3 (1)                                                      | 108 (12)                                                      |       |

<sup>a</sup> Other: neuroendocrine tumor (13), thyroid cancer (8), germ cell tumor (4), thymic cancer (2), mesothelioma (2), adrenal cortical cancer (2), malignant peripheral nerve sheath tumor (1), desmoid tumor (1), Bowen's disease (1), epithelioid hemangioendothelioma (1), and penile cancer (1).

<sup>b</sup> Missing data for neutrophils: n = 47.

<sup>c</sup> Missing data for hemoglobin: n = 47.

<sup>d</sup> Missing data for platelets: n = 47.

<sup>e</sup> Missing data for albumin: n = 52.

<sup>f</sup> Missing data for LDH: n = 53.

<sup>g</sup> Missing data for creatinine: n = 48.

<sup>h</sup> Missing data for total bilirubin: n = 59.

<sup>i</sup> Missing data for AST: n = 48.

<sup>j</sup> Missing data for CRP: n = 85.

Abbreviations: LDH, lactate dehydrogenase; AST, aspartate transaminase; ALT, alanine transaminase; CRP, C-reactive protein; ULN, upper normal limit; IQR, interquartile range.

**eTable 3. Characteristics of Patients Participating in Genotype-Matched and Genotype-Nonmatched Trials (Tumor Type and Laboratory Values, n = 241)**

| Characteristics                         | All-cancer clinical trials (n = 241) | Genotype-matched trials (n = 127) | Genotype-non-matched trials (n = 114) | P    |
|-----------------------------------------|--------------------------------------|-----------------------------------|---------------------------------------|------|
| Tumor type, n (%)                       |                                      |                                   |                                       |      |
| Gastrointestinal                        | 86 (36)                              | 44 (35)                           | 42 (37)                               | .72  |
| Hepatobiliary                           | 56 (23)                              | 30 (24)                           | 26 (23)                               |      |
| Gynecologic                             | 40 (17)                              | 22 (17)                           | 18 (16)                               |      |
| Lung                                    | 18 (7)                               | 9 (7)                             | 9 (8)                                 |      |
| Sarcoma                                 | 11 (5)                               | 8 (6)                             | 3 (3)                                 |      |
| Genitourinary                           | 10 (4)                               | 4 (3)                             | 6 (5)                                 |      |
| Breast                                  | 9 (4)                                | 4 (3)                             | 5 (4)                                 |      |
| Other <sup>a</sup>                      | 11 (5)                               | 6 (4)                             | 5 (4)                                 |      |
| Neutrophils (/μL), n (%)                |                                      |                                   |                                       |      |
| <1,500                                  | 4 (2)                                | 3 (2)                             | 1 (1)                                 | .69  |
| ≥1,500                                  | 237 (98)                             | 124 (98)                          | 113 (99)                              |      |
| Hemoglobin (g/dL), n (%)                |                                      |                                   |                                       |      |
| <9                                      | 4 (2)                                | 3 (2)                             | 1 (1)                                 | .69  |
| ≥9                                      | 237 (98)                             | 124 (98)                          | 113 (99)                              |      |
| Platelets (×10 <sup>3</sup> /μL), n (%) |                                      |                                   |                                       |      |
| <100                                    | 4 (2)                                | 3 (2)                             | 1 (1)                                 | .69  |
| ≥100                                    | 237 (98)                             | 124 (98)                          | 113 (99)                              |      |
| Albumin (g/dL), n (%)                   |                                      |                                   |                                       |      |
| <3.5                                    | 19 (8)                               | 11 (9)                            | 8 (7)                                 | .82  |
| ≥3.5                                    | 222 (92)                             | 116 (91)                          | 106 (93)                              |      |
| LDH (U/L), n (%)                        |                                      |                                   |                                       |      |
| <2.5 × ULN                              | 236 (98)                             | 125 (98)                          | 111 (97)                              | .90  |
| ≥2.5 × ULN                              | 5 (2)                                | 2 (2)                             | 3 (3)                                 |      |
| Creatinine (mg/dL), n (%)               |                                      |                                   |                                       |      |
| <1.5                                    | 240 (99)                             | 126 (99)                          | 114 (100)                             | >.99 |
| ≥1.5                                    | 1 (1)                                | 1 (1)                             | 0 (0)                                 |      |
| Total bilirubin (mg/dL), n (%)          |                                      |                                   |                                       |      |
| <1.5 × ULN                              | 240 (99)                             | 126 (99)                          | 114 (100)                             | >.99 |
| ≥1.5 × ULN                              | 1 (1)                                | 1 (1)                             | 0 (0)                                 |      |
| AST (U/L), n (%)                        |                                      |                                   |                                       |      |
| <3.0 × ULN                              | 240 (99)                             | 126 (99)                          | 114 (100)                             | >.99 |
| ≥3.0 × ULN                              | 1 (1)                                | 1 (1)                             | 0 (0)                                 |      |
| CRP (mg/dL) <sup>b</sup> , n (%)        |                                      |                                   |                                       |      |



| Characteristics | All-cancer clinical trials (n = 241) | Genotype-matched trials (n = 127) | Genotype-non-matched trials (n = 114) | <i>P</i> |
|-----------------|--------------------------------------|-----------------------------------|---------------------------------------|----------|
| <5              | 235 (98)                             | 123 (97)                          | 112 (100)                             | .29      |
| ≥5              | 3 (1)                                | 3 (2)                             | 0 (0)                                 |          |

<sup>a</sup> Others: head and neck cancers (4), thyroid cancer (2), mesothelioma (1), neuroendocrine tumor (1), melanoma (1), central nervous system tumor (1), and carcinoma of unknown primary (1).

<sup>b</sup> Missing data for CRP: n = 3.

Abbreviations: min, minute; LDH, lactate dehydrogenase; AST, aspartate transaminase; ALT, alanine transaminase; CRP, C-reactive protein; ULN, upper normal limit; IQR, interquartile range.

**eTable 4. Univariable and Multivariable Analyses of Factors Associated With All-Cancer Clinical Trial Participation by Travel Time to the Hospital (n = 1,127)**

|                                                                                  | Univariable analysis |            |                 | Multivariable analysis <sup>a</sup> |            |                 |
|----------------------------------------------------------------------------------|----------------------|------------|-----------------|-------------------------------------|------------|-----------------|
|                                                                                  | OR                   | 95% CI     | P               | OR                                  | 95% CI     | P               |
| Travel time ≥ 120 min (vs. < 120 min)                                            | 0.68                 | 0.47–0.96  | <b>.034</b>     | 0.70                                | 0.47–1.04  | .08             |
| Age ≥ 60 years (vs. < 60 years)                                                  | 0.81                 | 0.61–1.08  | .15             | 0.71                                | 0.51–0.98  | <b>.04</b>      |
| Gender, women (vs. men)                                                          | 0.89                 | 0.67–1.19  | .43             | NA                                  | NA         | NA              |
| Performance status ≥ 1 (vs. 0)                                                   | 0.32                 | 0.24–0.42  | <b>&lt;.001</b> | 0.43                                | 0.31–0.58  | <b>&lt;.001</b> |
| Body mass index < 18.5 (vs. ≥ 18.5)                                              | 0.71                 | 0.47–1.04  | .90             | 0.99                                | 0.63–1.54  | .98             |
| Tumor type, non-common cancers (vs. common cancers)                              | 0.71                 | 0.43–1.15  | .18             | 0.59                                | 0.33–1.03  | .07             |
| Number of lines of prior therapies ≥ 2 (vs. < 2)                                 | 1.68                 | 1.07–2.67  | <b>.023</b>     | 1.91                                | 1.17–3.23  | <b>.01</b>      |
| Number of metastatic sites ≥ 2 (vs. < 2)                                         | 0.71                 | 0.52–0.95  | <b>.022</b>     | 0.69                                | 0.48–0.99  | <b>.05</b>      |
| Liver metastases, yes (vs. no)                                                   | 0.78                 | 0.59–1.06  | .11             | 0.55                                | 0.38–0.79  | <b>.001</b>     |
| Brain metastases, yes (vs. no)                                                   | 0.51                 | 0.22–1.03  | .08             | 0.44                                | 0.18–1.02  | .05             |
| Pleural effusions or ascites, yes (vs. no)                                       | 0.25                 | 0.13–0.45  | <b>&lt;.001</b> | 0.30                                | 0.15–0.55  | <b>&lt;.001</b> |
| Biopsiable, no (vs. yes)                                                         | 0.43                 | 0.29–0.62  | <b>&lt;.001</b> | 0.27                                | 0.17–0.42  | <b>&lt;.001</b> |
| Neutrophils (/μL) < 1,500 (vs. ≥ 1,500)                                          | 0.26                 | 0.08–0.63  | <b>.009</b>     | 0.24                                | 0.07–0.60  | <b>.007</b>     |
| Hemoglobin (g/dL) < 9 (vs. ≥ 9)                                                  | 0.15                 | 0.05–0.37  | <b>&lt;.001</b> | 0.36                                | 0.09–1.01  | .06             |
| Platelets (×10 <sup>3</sup> /μL) < 100 (vs. ≥ 100)                               | 0.28                 | 0.08–0.69  | <b>.015</b>     | 0.27                                | 0.08–0.71  | <b>.02</b>      |
| Albumin (g/dL) < 3.5 (vs. ≥ 3.5)                                                 | 0.21                 | 0.13–0.34  | <b>&lt;.001</b> | 0.38                                | 0.21–0.64  | <b>&lt;.001</b> |
| LDH (U/L) ≥ 2.5 × ULN (vs. < 2.5 × ULN)                                          | 0.18                 | 0.06–0.41  | <b>&lt;.001</b> | 0.36                                | 0.12–0.87  | <b>.04</b>      |
| Creatinine (mg/dL) ≥ 1.5 (vs. < 1.5)                                             | 0.17                 | 0.01–1.20  | .19             | 0.47                                | 0.02–2.87  | .51             |
| Total bilirubin (mg/dL) ≥ 1.5 × ULN (vs. < 1.5 × ULN)                            | 0.47                 | 0.02–2.52  | .47             | NA                                  | NA         | NA              |
| AST (U/L) ≥ 3.0 × ULN (vs. < 3.0 × ULN)                                          | 0.12                 | 0.006–0.54 | <b>.034</b>     | 0.14                                | 0.007–0.70 | <b>.05</b>      |
| CRP (mg/dL) ≥ 5 (vs. < 5)                                                        | 0.09                 | 0.02–0.25  | <b>&lt;.001</b> | 0.21                                | 0.05–0.62  | <b>.01</b>      |
| Place of residence, suburban/rural (vs. urban)                                   | 1.01                 | 0.73–1.41  | .96             | NA                                  | NA         | NA              |
| Referring hospital, community (vs hospital university hospital or cancer center) | 0.89                 | 0.67–1.18  | .42             | NA                                  | NA         | NA              |
| Median income (by zip code) < 25,000\$ (vs. ≥ 25,000\$)                          | 1.03                 | 0.65–1.60  | .89             | NA                                  | NA         | NA              |

Note: All variables with  $P < 0.20$  were entered into the full model analysis.

Abbreviations: min, minute; LDH, lactate dehydrogenase; AST, aspartate transaminase; ALT, alanine transaminase; CRP, C-reactive protein; ULN, upper normal limit; OR, odds ratio; CI, confidence interval.

**eTable 5. Univariable and Multivariable Analyses of Factors Associated With All-Cancer Clinical Trial Participation by Travel Distance to the Hospital (n = 1,127)**

|                                                                                  | Univariable analysis |            |                 | Multivariable analysis <sup>a</sup> |            |                 |
|----------------------------------------------------------------------------------|----------------------|------------|-----------------|-------------------------------------|------------|-----------------|
|                                                                                  | OR                   | 95% CI     | P               | OR                                  | 95% CI     | P               |
| Travel distance ≥ 100 km (vs. < 100 km)                                          | 0.74                 | 0.52–1.02  | .07             | 0.76                                | 0.51–1.10  | .15             |
| Age ≥ 60 years (vs. < 60 years)                                                  | 0.81                 | 0.61–1.08  | .15             | 0.71                                | 0.51–0.98  | <b>.04</b>      |
| Gender, women (vs. men)                                                          | 0.89                 | 0.67–1.19  | .43             | NA                                  | NA         | NA              |
| Performance status ≥ 1 (vs. 0)                                                   | 0.32                 | 0.24–0.42  | <b>&lt;.001</b> | 0.42                                | 0.31–0.59  | <b>&lt;.001</b> |
| Body mass index < 18.5 (vs. ≥ 18.5)                                              | 0.71                 | 0.47–1.04  | .90             | 0.99                                | 0.63–1.55  | .98             |
| Tumor type, non-common cancers (vs. common cancers)                              | 0.71                 | 0.43–1.15  | .18             | 0.59                                | 0.33–1.03  | .07             |
| Number of lines of prior therapies ≥ 2 (vs. < 2)                                 | 1.68                 | 1.07–2.67  | <b>.02</b>      | 1.89                                | 1.15–3.18  | <b>.01</b>      |
| Number of metastatic sites ≥ 2 (vs. < 2)                                         | 0.71                 | 0.52–0.95  | <b>.02</b>      | 0.68                                | 0.48–0.99  | <b>.05</b>      |
| Liver metastases, yes (vs. no)                                                   | 0.78                 | 0.59–1.06  | .11             | 0.55                                | 0.38–0.78  | <b>.001</b>     |
| Brain metastases, yes (vs. no)                                                   | 0.51                 | 0.22–1.03  | .08             | 0.44                                | 0.18–1.01  | .05             |
| Pleural effusions or ascites, yes (vs. no)                                       | 0.25                 | 0.13–0.45  | <b>&lt;.001</b> | 0.30                                | 0.15–0.55  | <b>&lt;.001</b> |
| Biopsiable, no (vs. yes)                                                         | 0.43                 | 0.29–0.62  | <b>&lt;.001</b> | 0.27                                | 0.17–0.42  | <b>&lt;.001</b> |
| Neutrophils (/μL) < 1,500 (vs. ≥ 1,500)                                          | 0.26                 | 0.08–0.63  | <b>.009</b>     | 0.24                                | 0.070–0.60 | <b>.007</b>     |
| Hemoglobin (g/dL) < 9 (vs. ≥ 9)                                                  | 0.15                 | 0.05–0.37  | <b>&lt;.001</b> | 0.36                                | 0.10–1.02  | .06             |
| Platelets (×10 <sup>3</sup> /μL) < 100 (vs. ≥ 100)                               | 0.28                 | 0.08–0.69  | <b>.02</b>      | 0.27                                | 0.077–0.72 | <b>.02</b>      |
| Albumin (g/dL) < 3.5 (vs. ≥ 3.5)                                                 | 0.21                 | 0.13–0.34  | <b>&lt;.001</b> | 0.38                                | 0.21–0.63  | <b>&lt;.001</b> |
| LDH (U/L) ≥ 2.5 × ULN (vs. < 2.5 × ULN)                                          | 0.18                 | 0.06–0.41  | <b>&lt;.001</b> | 0.36                                | 0.12–0.88  | <b>.04</b>      |
| Creatinine (mg/dL) ≥ 1.5 (vs. < 1.5)                                             | 0.17                 | 0.01–1.20  | .19             | 0.47                                | 0.02–2.85  | .49             |
| Total bilirubin (mg/dL) ≥ 1.5 × ULN (vs. < 1.5 × ULN)                            | 0.47                 | 0.02–2.52  | .47             | NA                                  | NA         | NA              |
| AST (U/L) ≥ 3.0 × ULN (vs. < 3.0 × ULN)                                          | 0.12                 | 0.006–0.54 | <b>.03</b>      | 0.13                                | 0.007–0.69 | <b>.05</b>      |
| CRP (mg/dL) ≥ 5 (vs. < 5)                                                        | 0.09                 | 0.02–0.25  | <b>&lt;.001</b> | 0.22                                | 0.050–0.63 | <b>.01</b>      |
| Place of residence, suburban/rural (vs. urban)                                   | 1.01                 | 0.73–1.41  | .96             | NA                                  | NA         | NA              |
| Referring hospital, community (vs hospital university hospital or cancer center) | 0.89                 | 0.67–1.18  | .42             | NA                                  | NA         | NA              |
| Median income (by zip code) < 25,000\$ (vs. ≥25,000\$)                           | 1.03                 | 0.65–1.60  | .89             | NA                                  | NA         | NA              |

Note: All variables with P < 0.20 were entered into the full model analysis.

Abbreviations: LDH, lactate dehydrogenase; AST, aspartate transaminase; ALT, alanine transaminase; CRP, C-reactive protein; ULN, upper normal limit; OR, odds ratio; CI, confidence interval.

**eFigure 1. Travel Time and Distance Map Centered on the National Cancer Center Hospital**

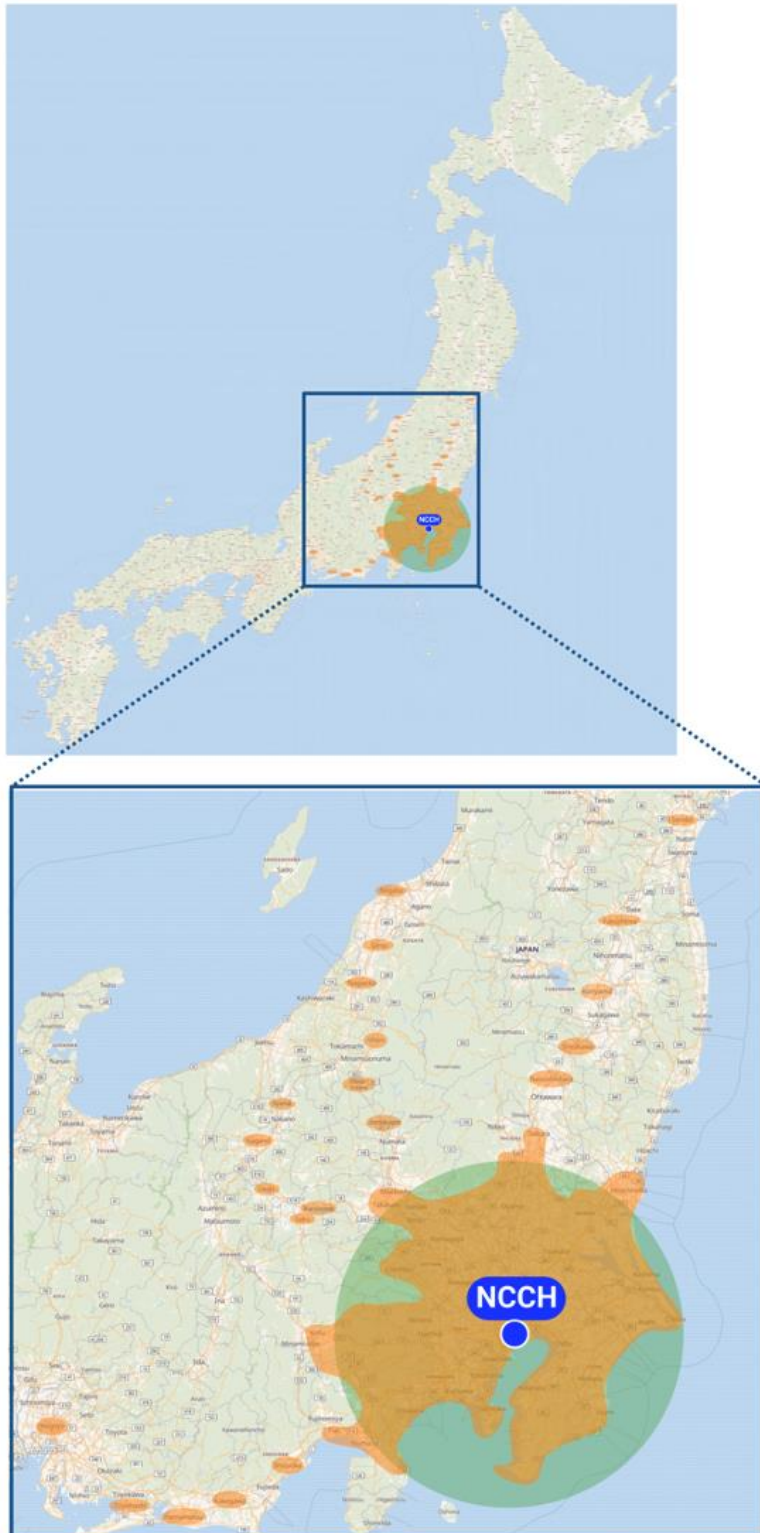

Maps showing the NCCH at the center, marked with a blue circle. The orange area indicates the region within a 120-min travel time from the NCCH. The green circle is mapped within a 100-km radius from the NCCH. The diagram was prepared using Google Maps and BioRender (<https://www.biorender.com/>).

Abbreviations: NCCH, National Cancer Center Hospital.

**eFigure 2. Correlation Between Travel Time and Distance**

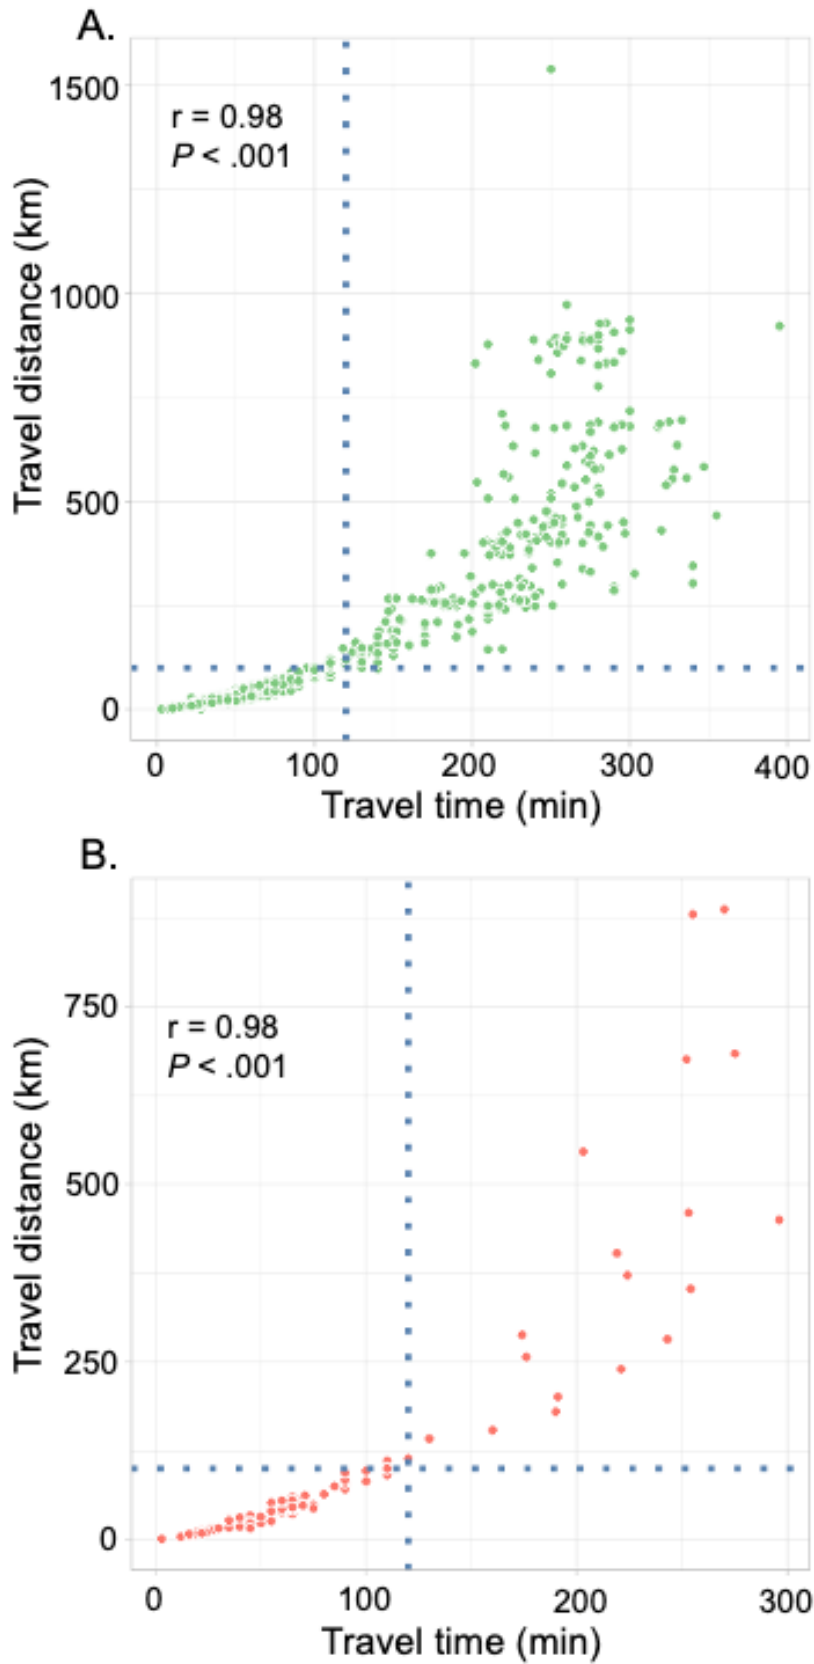

**(A)** Overall patients (n = 1,127). **(B)** Genotype-matched trial participation (n = 127).

**eFigure 3. Scatter Plot of Patients With a Travel Time Less Than 120 Minutes and Travel Distance 100 or More km (n = 35)**

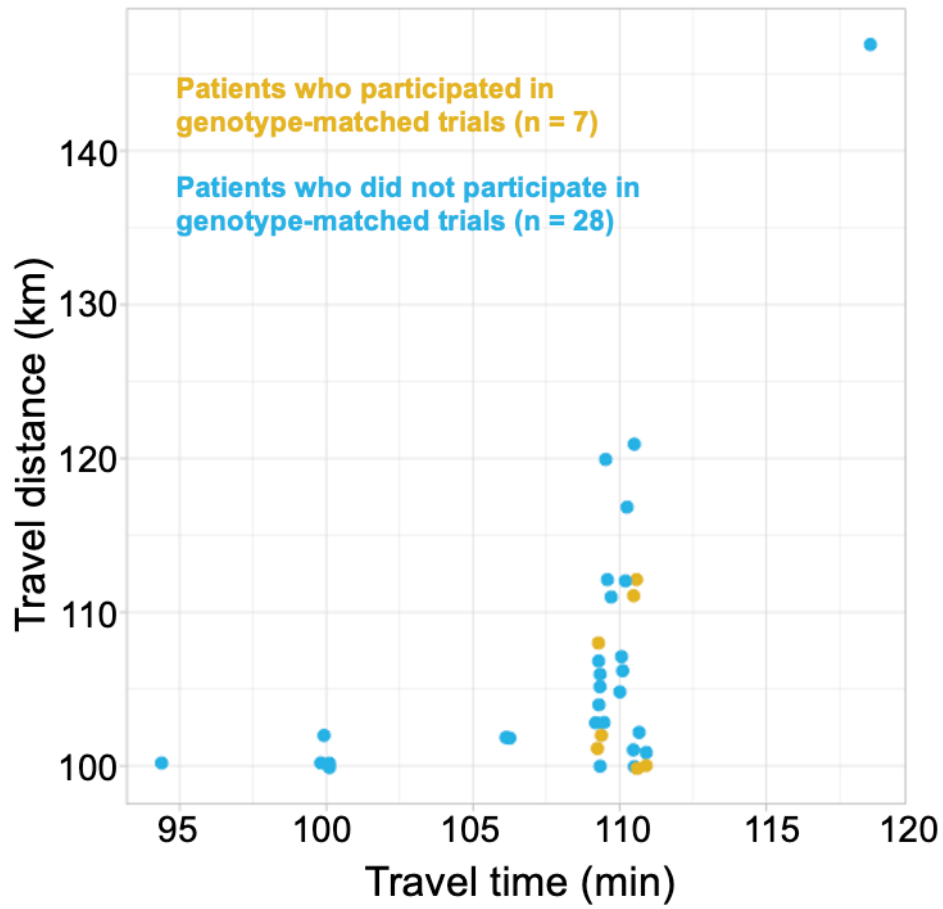

Supplement: jamanetwopen-e2333188-s001.pdf [file jamanetwopen-e2333188-s001.pdf]
